# Supplementary material
Source: HighWire-hosted journal article supplement (https://jnm.snmjournals.org/highwire/filestream/94325/field_highwire_adjunct_files/0/108043_Supplemental_Data.pdf)
Supplement: 108043_Supplemental_Data.pdf [file 108043_Supplemental_Data.pdf]

## 1. Stability test using DLS measurement

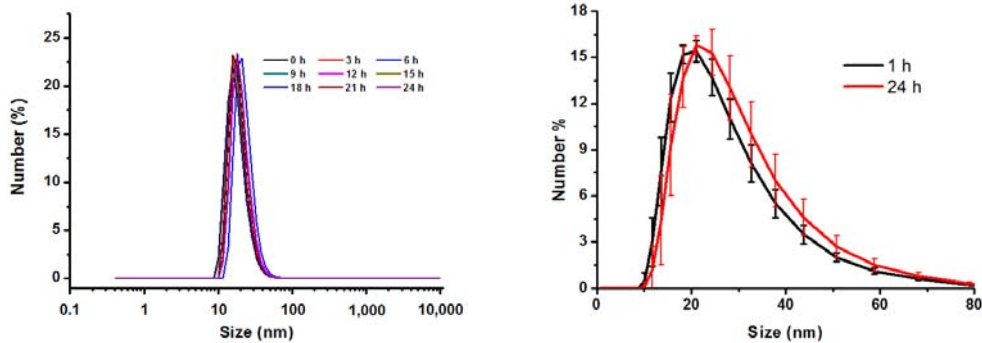

Supplemental Figure 1. Stability test using DLS measurement

## 2. Magnetic properties of UCNPs

**Measurement of  $T_1$  relaxation time.** Proton relaxation time was measured by the Carr-Purcell-Meiboom-Gill (CPMG) sequence at room temperature: TR 7 s, 100 echoes with 8.7 ms even echo space, number of acquisitions 1, point resolution of 417 - 469  $\mu\text{m}$  and section thickness of 2 mm. The resulting  $T_1$  (spin-lattice relaxation time) values were averaged and plotted as  $1/T_1$  vs  $\text{Gd}^{3+}$  molar concentration. The slopes of the graph provided the molar relaxivity  $r_1$ .

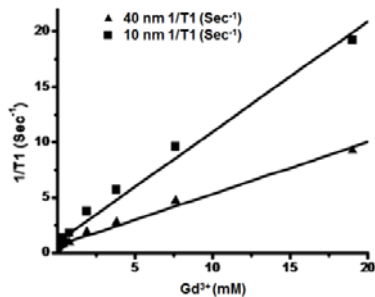

Supplemental Figure 2. Linearity of the concentration dependent contrast effect is obtained by plotting  $1/T_1$  as a function of  $[\text{Gd}^{3+}]$ . The specific relaxivities ( $r_1$ ) for 10 and 40 nm UCNPs were determined to be 0.99 and 0.47  $\text{mM}^{-1}\text{s}^{-1}$ , respectively.

To further evaluate the magnetic properties of  $\text{NaGdF}_4: \text{Yb}^{3+}, \text{Er}^{3+}$ , the aqueous solution of UCNPs at various concentrations was measured for their  $T_1$  relaxation time. MR images in Supplemental Figure 2 show the  $\text{Gd}^{3+}$  concentration dependent contrast effect of the UCNPs. UCNPs with smaller size of 10 nm exhibited higher  $T_1$  contrast enhancing effect. Linearity of the concentration dependent contrast effect is obtained by plotting  $1/T_1$  as a function of  $[\text{Gd}^{3+}]$ . The specific relaxivities ( $r_1$ ) for 10 and 40 nm UCNPs were determined to be 0.99 and 0.47  $\text{mM}^{-1}\text{s}^{-1}$ , respectively. The result showing the size dependent relaxivity was also reported in the literature (Park, Y. I. et al. Adv. Mater. 2009, 21, 4467).

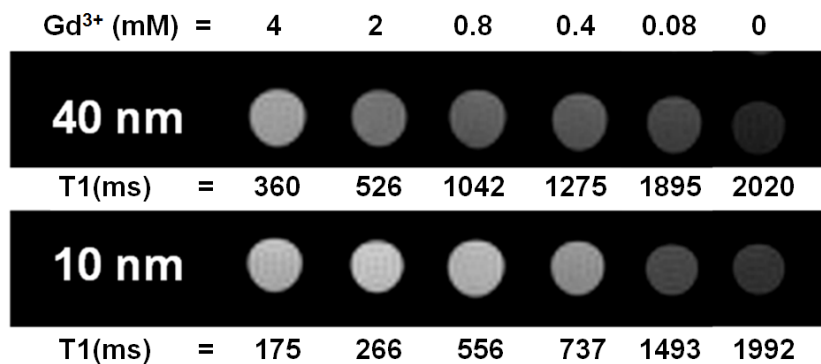

**Supplemental Figure 3.** T<sub>1</sub> weighted magnetic resonance images of UCNPs at various [Gd<sup>3+</sup>] concentrations in water.

### 3. PET image-based biodistribution

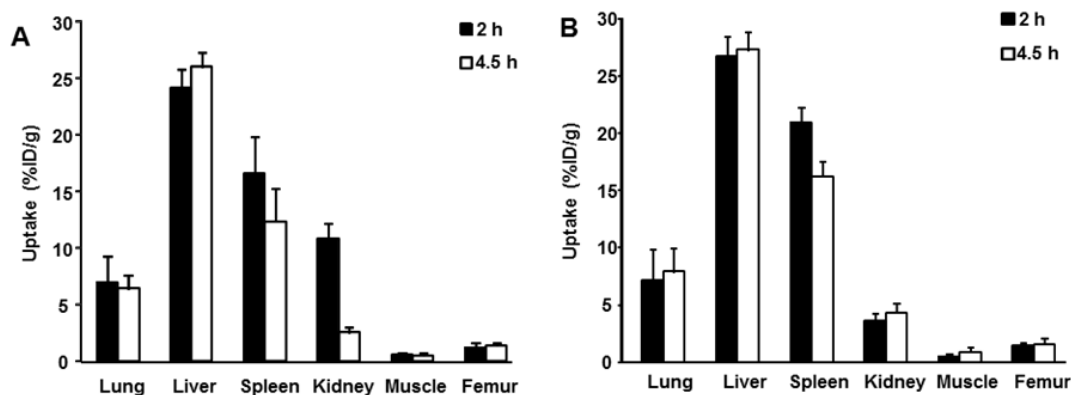

**Supplemental Figure 4.** PET image-based *in vivo* biodistribution of <sup>124</sup>I-(cRGDyk)<sub>2</sub>-UCNPs (A) and <sup>124</sup>I-(cRGDyk)<sub>2</sub>-UCNPs (B) with blocking dose of (cRGDyk)<sub>2</sub> peptides in U87MG tumor bearing mice. The PET images were analyzed with Inveon Research workplace (IRW) software for organ radioactivity quantification. The radioactivity (%ID/g) in various tissues at 2 h and 4.5 h post-injection of radiotracer was measured by image region-of-interest (ROI) analysis of microPET datasets.

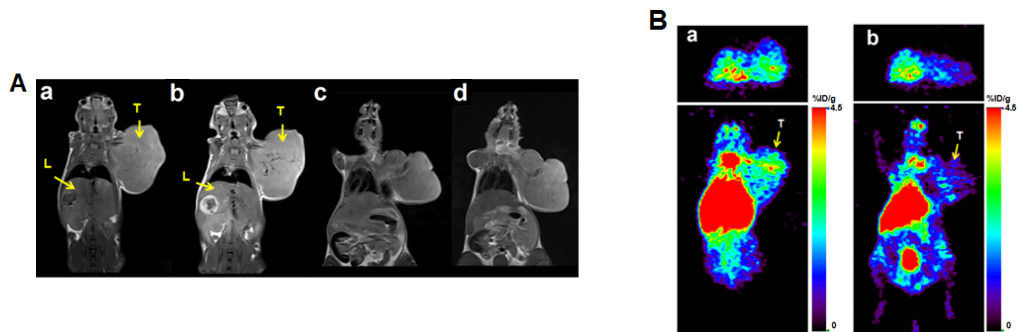

**Supplemental Figure 5.** (A) T1-weighted MR coronal images in U87MG tumor bearing mice; (a) before injection of  $^{124}\text{I}$ -(cRGDyk) $_2$ -UCNPs and (B) Small animal PET transverse (upper) and coronal (lower) images of U87MG tumor bearing nude mice.
